# Supplementary material for: ClpP participates in stress tolerance, biofilm formation, antimicrobial tolerance, and virulence of Enterococcus faecalis
Source: PubMed Central journal article supplement (PMC7006429; doi:10.1186/s12866-020-1719-9), 2020-02-07
Supplement: 12866_2020_1719_MOESM4_ESM.pdf [file 12866_2020_1719_MOESM4_ESM.pdf]

**Table S1** Antimicrobial susceptibility of *E.faecalis* determined by conventional broth macrodilution method

| Antimicrobials | Minimum inhibitory concentration (mg/L) |               |                            |                       |
|----------------|-----------------------------------------|---------------|----------------------------|-----------------------|
|                | OG1RF                                   | $\Delta clpP$ | $\Delta clpP/pIB166::clpP$ | $\Delta clpP/ pIB166$ |
| Ampicillin     | 2                                       | 2             | 2                          | 2                     |
| Vancomycin     | 2                                       | 2             | 2                          | 2                     |
| Linezolid      | 2                                       | 2             | 2                          | 2                     |
| Daptomycin     | 4                                       | 4             | 4                          | 4                     |
| Levofloxacin   | 1                                       | 1             | 1                          | 1                     |
| Rifampin       | 128                                     | 128           | 128                        | 128                   |
| Minocycline    | 1                                       | 1             | 1                          | 1                     |
| Gentamicin     | 16                                      | 16            | 16                         | 16                    |

**Table S2** Primers used for the RT-qPCR for the detection of RNA levels of differential abundance proteins

| Primers              | Sequences (5' →3')       | Location (CP002621.1) | PCR product size (bp) |
|----------------------|--------------------------|-----------------------|-----------------------|
| <i>OG1RF_11529-F</i> | GCCTGGATATGATTGTTC       | 1591964-1591981       | 160                   |
| <i>OG1RF_11529-R</i> | CGTTAGAAGCATTGGTAA       | 1592106-1592123       |                       |
| <i>OG1RF_11526-F</i> | CATCGCCATATTGAACTT       | 1587615-1587632       | 142                   |
| <i>OG1RF_11526-R</i> | TACACCATTATCCAGAACT      | 1587738-1587756       |                       |
| <i>OG1RF_12531-F</i> | TTCGTAATCACTTCTTCTTCATAC | 2681827-2681850       | 144                   |
| <i>OG1RF_12531-R</i> | CGGCTATATTCGCATTGTC      | 2681952-2681970       |                       |
| <i>OG1RF_12530-F</i> | GGTGAATAAGGTAAGTATAAGTTG | 2681435-2681458       | 94                    |
| <i>OG1RF_12530-R</i> | CAGAAGACATCCGTGAAG       | 2681511-2681528       |                       |
| <i>OG1RF_12246-F</i> | TATGCTGCTTACCAAGAA       | 2368619-2368636       | 171                   |
| <i>OG1RF_12246-R</i> | ATGTCCATCTAACCAAGG       | 2368772-2368789       |                       |
| <i>OG1RF_12047-F</i> | CGAACATCTCTTGGTAAG       | 2163367-2163384       | 191                   |
| <i>OG1RF_12047-R</i> | ATTATCTCTACTCGCTCTAA     | 2163538-2163557       |                       |
| <i>OG1RF_11076-F</i> | CTCAATGGCTGGTTATCGTTA    | 1118547-1118567       | 81                    |
| <i>OG1RF_11076-R</i> | CGGATTCTTCTAAGTTCGTTCT   | 1118606-1118627       |                       |
| <i>OG1RF_12006-F</i> | TCCGATACCTAAGTCAACATT    | 2117850-2117870       | 91                    |
| <i>OG1RF_12006-R</i> | AGAAGAACCAATCCGTCAA      | 2117922-2117940       |                       |
| <i>OG1RF_10167-F</i> | TGCCTCTGCCTTGGATAA       | 171420-171437         | 123                   |
| <i>OG1RF_10167-R</i> | CCACGGTCGAAGACTACT       | 171525-171542         |                       |
| <i>OG1RF_10152-F</i> | TTGGTAGCAGTAGAAGGTT      | 164816-164834         | 175                   |
| <i>OG1RF_10152-R</i> | CGTTATCAGAAGTTACTACAGAA  | 164968-164990         |                       |
| <i>OG1RF_12487-F</i> | CATTGAGTGACGGTAGTA       | 2623318-2623335       | 158                   |
| <i>OG1RF_12487-R</i> | GTCTATCAGCAGTTGTTG       | 2623458-2623475       |                       |
| <i>OG1RF_10643-F</i> | ATGAACTCTTATTACTATGC     | 680865-680884         | 152                   |
| <i>OG1RF_10643-R</i> | ATATCAATCTCTGCCAAT       | 680999-681016         |                       |
| <i>OG1RF_10009-F</i> | CGACTATAAAGATACTGAAT     | 10363-10382           | 152                   |
| <i>OG1RF_10009-R</i> | TAACGAATGGTAATAATCC      | 10496-10514           |                       |
| <i>OG1RF_12468-F</i> | CTCATCCAAGTCGCTTAA       | 2603594-2603611       | 89                    |
| <i>OG1RF_12468-R</i> | GAAACGAATCCGAGACAT       | 2603665-2603682       |                       |
| <i>OG1RF_12080-F</i> | TTCAAGCCTAAGCCAGTT       | 2202715-2202732       | 107                   |
| <i>OG1RF_12080-R</i> | GGAGCAGCAGAAGAACAA       | 2202804-2202821       |                       |
| <i>OG1RF_12046-F</i> | ACTGCTTCACTACCTTGGA      | 2162803-2162821       | 127                   |
| <i>OG1RF_12046-R</i> | AAGACCTGGCGGATAGAG       | 2162912-2162929       |                       |
| <i>OG1RF_11423-F</i> | CACAGCAGGATAACTCAT       | 1483761-1483778       | 114                   |
| <i>OG1RF_11423-R</i> | TTATTAGATATTGAAGCGGTATT  | 1483852-1483874       |                       |
| <i>OG1RF_11424-F</i> | AGCATAATGAATGACT         | 1484179-1484196       | 149                   |
| <i>OG1RF_11424-R</i> | CTAAGGAAGGTCTAATCAA      | 1484309-1484327       |                       |
| <i>OG1RF_11429-F</i> | CTAATGCTCCGTCAACAA       | 1490733-1490750       | 82                    |
| <i>OG1RF_11429-R</i> | GAATCAATGGCTGTCAATAC     | 1490795-1490814       |                       |
